# Supplementary material
Source: PubMed Central journal article supplement (PMC10556725)
Supplement: peds_2013-3856SupplementaryData.pdf [file peds_2013-3856SupplementaryData.pdf]

## Supplemental Information

**SUPPLEMENTARY TABLE 4** aHRs for Association Between Gestational Age at Birth and PE in Different Intervals of Attained Age (1973–2010)

|                     | PE Events | Person-Years | Rate <sup>a</sup> | Model 1 <sup>b</sup> |          | Model 2 <sup>c</sup> |          |
|---------------------|-----------|--------------|-------------------|----------------------|----------|----------------------|----------|
|                     |           |              |                   | HR (95% CI)          | <i>P</i> | HR (95% CI)          | <i>P</i> |
| <b>Ages &lt;1 y</b> |           |              |                   |                      |          |                      |          |
| 22–27 wk            | 0         | 4702         | 0.00              | NE                   | NE       | NE                   | NE       |
| 28–33 wk            | 1         | 42 455       | 2.36              | 13.90 (1.64–117.56)  | .02      | 28.38 (2.88–279.33)  | .004     |
| 34–36 wk            | 3         | 151 185      | 1.98              | 10.56 (2.62–42.54)   | .001     | NE                   | NE       |
| 37–41 wk            | 6         | 3 057 952    | 0.20              | 1.00                 |          | 1.00                 |          |
| ≥42 wk              | 1         | 297 515      | 0.34              | 1.28 (0.15–11.09)    | .82      | 3.05 (0.30–30.55)    | .34      |
| <b>Ages 1–5 y</b>   |           |              |                   |                      |          |                      |          |
| 22–27 wk            | 0         | 20 989       | 0.00              | NE                   | NE       | NE                   | NE       |
| 28–33 wk            | 0         | 199 980      | 0.00              | NE                   | NE       | NE                   | NE       |
| 34–36 wk            | 3         | 719 223      | 0.42              | 3.54 (0.96–13.01)    | .06      | 1.50 (0.15–14.83)    | .73      |
| 37–41 wk            | 16        | 14 553 535   | 0.11              | 1.00                 |          | 1.00                 |          |
| ≥42 wk              | 2         | 1 432 007    | 0.14              | 1.23 (0.28–5.41)     | .79      | 1.39 (0.17–11.50)    | .76      |
| <b>Ages 6–12 y</b>  |           |              |                   |                      |          |                      |          |
| 22–27 wk            | 0         | 20 885       | 0.00              | NE                   | NE       | NE                   | NE       |
| 28–33 wk            | 0         | 225 980      | 0.00              | NE                   | NE       | NE                   | NE       |
| 34–36 wk            | 0         | 833 519      | 0.00              | NE                   | NE       | NE                   | NE       |
| 37–41 wk            | 11        | 16 893 753   | 0.07              | 1.00                 |          | 1.00                 |          |
| ≥42 wk              | 2         | 1 720 698    | 0.12              | 1.66 (0.35–7.90)     | .53      | 1.94 (0.40–9.53)     | .41      |
| <b>Ages 13–17 y</b> |           |              |                   |                      |          |                      |          |
| 22–27 wk            | 0         | 9993         | 0.00              | NE                   | NE       | NE                   | NE       |
| 28–33 wk            | 5         | 125 166      | 3.99              | 2.30 (0.92–5.72)     | .07      | 1.94 (0.77–4.87)     | .16      |
| 34–36 wk            | 9         | 477 469      | 1.88              | 1.13 (0.57–2.24)     | .72      | 0.83 (0.38–1.79)     | .63      |
| 37–41 wk            | 163       | 9 712 618    | 1.44              | 1.00                 |          | 1.00                 |          |
| ≥42 wk              | 18        | 1 033 223    | 1.74              | 1.08 (0.66–1.76)     | .77      | 1.00 (0.60–1.69)     | .99      |
| <b>Ages 18–38 y</b> |           |              |                   |                      |          |                      |          |
| 22–27 wk            | 4         | 10 590       | 37.77             | 3.92 (1.47–10.47)    | .006     | 1.86 (0.60–5.81)     | .29      |
| 28–33 wk            | 29        | 187 984      | 15.43             | 1.68 (1.16–2.43)     | .006     | 1.32 (0.88–1.96)     | .18      |
| 34–36 wk            | 96        | 768 234      | 12.50             | 1.37 (1.11–1.69)     | .003     | 1.29 (1.04–1.59)     | .02      |
| 37–41 wk            | 1469      | 16 193 702   | 9.07              | 1.00                 |          | 1.00                 |          |
| ≥42 wk              | 208       | 2 118 866    | 9.82              | 1.03 (0.89–1.20)     | .67      | 1.04 (0.89–1.20)     | .64      |

NE, not estimable.

<sup>a</sup> Incidence rate for first episode of PE per 100 000 person-years.

<sup>b</sup> Adjusted for age/gender/birth cohort, fetal growth, multiple birth, birth order, maternal age, maternal marital status, maternal and paternal education, and family history of VTE in a parent or sibling.

<sup>c</sup> Excluding individuals with significant congenital anomalies or cerebral palsy and adjusted for the same variables as model 1, as well as diabetes, heart failure, asthma, pneumonia, cancer, and fracture.

**SUPPLEMENTARY TABLE 5** aHRs for Association Between Gestational Age at Birth and DVT in Different Intervals of Attained Age (1973–2010)

|                     | DVT Events | Person-years | Rate <sup>a</sup> | Model 1 <sup>b</sup> |       | Model 2 <sup>c</sup> |       |
|---------------------|------------|--------------|-------------------|----------------------|-------|----------------------|-------|
|                     |            |              |                   | HR (95% CI)          | P     | HR (95% CI)          | P     |
| <b>Âges &lt;1 y</b> |            |              |                   |                      |       |                      |       |
| 22–27 wk            | 2          | 4699         | 42.56             | 78.08 (17.36–351.07) | <.001 | 60.66 (11.96–307.63) | <.001 |
| 28–33 wk            | 2          | 42 452       | 4.71              | 9.10 (2.09–39.69)    | .003  | NE                   | NE    |
| 34–36 wk            | 2          | 151 184      | 1.32              | 2.54 (0.59–11.00)    | .21   | NE                   | NE    |
| 37–41 wk            | 18         | 3 057 940    | 0.59              | 1.00                 |       | 1.00                 |       |
| ≥42 wk              | 5          | 297 513      | 1.68              | 2.52 (0.92–6.93)     | .07   | 1.79 (0.50–6.39)     | .37   |
| <b>Âges 1–5 y</b>   |            |              |                   |                      |       |                      |       |
| 22–27 wk            | 1          | 20 971       | 4.77              | 19.37 (2.53–148.06)  | .004  | 10.76 (1.32–87.77)   | .03   |
| 28–33 wk            | 0          | 199 965      | 0.00              | NE                   | NE    | NE                   | NE    |
| 34–36 wk            | 6          | 719 216      | 0.83              | 3.36 (1.37–8.25)     | .008  | 2.22 (0.75–6.57)     | .15   |
| 37–41 wk            | 35         | 14 553 368   | 0.24              | 1.00                 |       | 1.00                 |       |
| ≥42 wk              | 6          | 1 431 983    | 0.42              | 1.71 (0.71–4.12)     | .23   | 1.38 (0.48–3.97)     | .55   |
| <b>Âges 6–12 y</b>  |            |              |                   |                      |       |                      |       |
| 22–27 wk            | 0          | 20 877       | 0.00              | NE                   | NE    | NE                   | NE    |
| 28–33 wk            | 2          | 225 964      | 0.89              | 2.72 (0.66–11.14)    | .17   | 1.13 (0.15–8.23)     | .91   |
| 34–36 wk            | 7          | 883 483      | 0.84              | 2.45 (1.12–5.35)     | .03   | 2.40 (1.09–5.26)     | .03   |
| 37–41 wk            | 67         | 16 893 450   | 0.40              | 1.00                 |       | 1.00                 |       |
| ≥42 wk              | 7          | 1 720 654    | 0.41              | 1.10 (0.50–2.40)     | .82   | 1.19 (0.54–2.62)     | .66   |
| <b>Âges 13–17 y</b> |            |              |                   |                      |       |                      |       |
| 22–27 wk            | 0          | 9990         | 0.00              | NE                   | NE    | NE                   | NE    |
| 28–33 wk            | 12         | 125 146      | 9.59              | 2.42 (1.35–4.32)     | .003  | 2.15 (1.17–3.94)     | .01   |
| 34–36 wk            | 22         | 477 422      | 4.61              | 1.15 (0.75–1.77)     | .52   | 0.93 (0.58–1.49)     | .76   |
| 37–41 wk            | 405        | 9 711 883    | 4.17              | 1.00                 |       | 1.00                 |       |
| ≥42 wk              | 44         | 1 033 150    | 4.26              | 1.04 (0.76–1.43)     | .80   | 1.10 (0.80–1.51)     | .56   |
| <b>Âges 18–38 y</b> |            |              |                   |                      |       |                      |       |
| 22–27 wk            | 4          | 10 591       | 37.77             | 2.02 (0.76–5.39)     | .16   | 1.50 (0.48–4.65)     | .49   |
| 28–33 wk            | 41         | 187 902      | 21.82             | 1.15 (0.85–1.57)     | .37   | 1.04 (0.74–1.46)     | .81   |
| 34–36 wk            | 178        | 767 644      | 23.19             | 1.22 (1.05–1.42)     | .01   | 1.15 (0.98–1.34)     | .09   |
| 37–41 wk            | 3154       | 16 182 966   | 19.49             | 1.00                 |       | 1.00                 |       |
| ≥42 wk              | 447        | 2 117 461    | 21.11             | 1.01 (0.91–1.12)     | .86   | 1.02 (0.92–1.13)     | .67   |

NE, not estimable.

<sup>a</sup> Incidence rate for first episode of DVT per 100 000 person-years.

<sup>b</sup> Adjusted for age/gender, birth cohort, fetal growth, multiple birth, birth order, maternal age, maternal marital status, maternal and paternal education, and family history of VTE in a parent or sibling.

<sup>c</sup> Excluding individuals with significant congenital anomalies or cerebral palsy and adjusted for the same variables as model 1, as well as diabetes, heart failure, asthma, pneumonia, cancer, and fracture.

**SUPPLEMENTARY TABLE 6** aHRs for Association Between Gestational Age at Birth and OVTE (Non-DVT/PE) in Different Intervals of Attained Age (1973–2010)

|              | OVTE events | Person-years | Rate <sup>a</sup> | Model 1 <sup>b</sup> |       | Model 2 <sup>c</sup> |       |
|--------------|-------------|--------------|-------------------|----------------------|-------|----------------------|-------|
|              |             |              |                   | HR (95% CI)          | P     | HR (95% CI)          | P     |
| Ages <1 y    |             |              |                   |                      |       |                      |       |
| 22–27 wk     | 5           | 4696         | 106.47            | 41.10 (16.01–105.52) | <.001 | 35.35 (11.88–105.14) | <.001 |
| 28–33 wk     | 5           | 42 447       | 11.78             | 4.99 (1.97–12.64)    | .001  | 3.43 (1.04–11.31)    | .04   |
| 34–36 wk     | 11          | 151 175      | 7.28              | 3.13 (1.64–5.98)     | .001  | 1.98 (0.84–4.65)     | .12   |
| 37–41 wk     | 72          | 3 057 901    | 2.35              | 1.00                 |       | 1.00                 |       |
| ≥42 wk       | 13          | 297 507      | 4.37              | 1.89 (1.04–3.43)     | .04   | 1.76 (0.89–3.47)     | .10   |
| Ages 1–5 y   |             |              |                   |                      |       |                      |       |
| 22–27 wk     | 0           | 20 953       | 0.00              | NE                   | NE    | NE                   | NE    |
| 28–33 wk     | 6           | 199 912      | 3.00              | 4.91 (2.11–11.41)    | <.001 | 4.88 (1.95–12.23)    | .001  |
| 34–36 wk     | 9           | 719 151      | 1.25              | 2.00 (1.00–3.98)     | .05   | 1.10 (0.40–3.01)     | .86   |
| 37–41 wk     | 97          | 14 553 013   | 0.67              | 1.00                 |       | 1.00                 |       |
| ≥42 wk       | 13          | 1 431 920    | 0.91              | 1.33 (0.74–2.38)     | .35   | 1.34 (0.69–2.61)     | .39   |
| Ages 6–12 y  |             |              |                   |                      |       |                      |       |
| 22–27 wk     | 0           | 20 848       | 0.00              | NE                   | NE    | NE                   | NE    |
| 28–33 wk     | 2           | 225 879      | 0.89              | 1.52 (0.37–6.32)     | .56   | 1.45 (0.35–6.11)     | .61   |
| 34–36 wk     | 5           | 833 432      | 0.60              | 1.03 (0.42–2.57)     | .94   | 1.12 (0.45–2.82)     | .80   |
| 37–41 wk     | 96          | 16 892 718   | 0.57              | 1.00                 |       | 1.00                 |       |
| ≥42 wk       | 8           | 1 720 575    | 0.46              | 0.85 (0.41–1.77)     | .67   | 0.63 (0.26–1.58)     | .33   |
| Ages 13–17 y |             |              |                   |                      |       |                      |       |
| 22–27 wk     | 0           | 9988         | 0.00              | NE                   | NE    | NE                   | NE    |
| 28–33 wk     | 7           | 125 109      | 5.60              | 1.64 (0.76–3.52)     | .21   | 1.45 (0.63–3.30)     | .38   |
| 34–36 wk     | 15          | 477 394      | 3.14              | 1.00 (0.59–1.69)     | .99   | 0.83 (0.46–1.50)     | .54   |
| 37–41 wk     | 289         | 9 711 654    | 2.98              | 1.00                 |       | 1.00                 |       |
| ≥42 wk       | 31          | 1 033 128    | 3.00              | 0.98 (0.67–1.43)     | .91   | 0.98 (0.67–1.45)     | .92   |
| Ages 18–38 y |             |              |                   |                      |       |                      |       |
| 22–27 wk     | 2           | 10 594       | 18.88             | 2.37 (0.59–9.48)     | .22   | 1.90 (0.47–7.68)     | .37   |
| 28–33 wk     | 28          | 187 908      | 14.90             | 1.89 (1.30–2.76)     | .001  | 1.82 (1.23–2.69)     | .003  |
| 34–36 wk     | 73          | 768 124      | 9.50              | 1.20 (0.94–1.52)     | .14   | 1.12 (0.88–1.44)     | .36   |
| 37–41 wk     | 1343        | 16 191 669   | 8.29              | 1.00                 |       | 1.00                 |       |
| ≥42 wk       | 163         | 2 118 822    | 7.69              | 0.86 (0.73–1.02)     | .08   | 0.88 (0.75–1.04)     | .14   |

<sup>a</sup> Incidence rate for first episode of OVTE per 100 000 person-years.

<sup>b</sup> Adjusted for age, gender, birth cohort, fetal growth, multiple birth, birth order, maternal age, maternal marital status, maternal and paternal education, and family history of VTE in a parent or sibling.

<sup>c</sup> Excluding individuals with significant congenital anomalies or cerebral palsy, and adjusted for the same variables as model 1, as well as diabetes, heart failure, asthma, pneumonia, cancer, and fracture.
